# Supplementary material for: Psychometric properties of the kidney disease quality of life-36 (KDQOL-36) in Ethiopian patients undergoing hemodialysis
Source: Springer Nature journal article supplement (doi:10.1186/s12955-022-01932-y), 2022-02-10

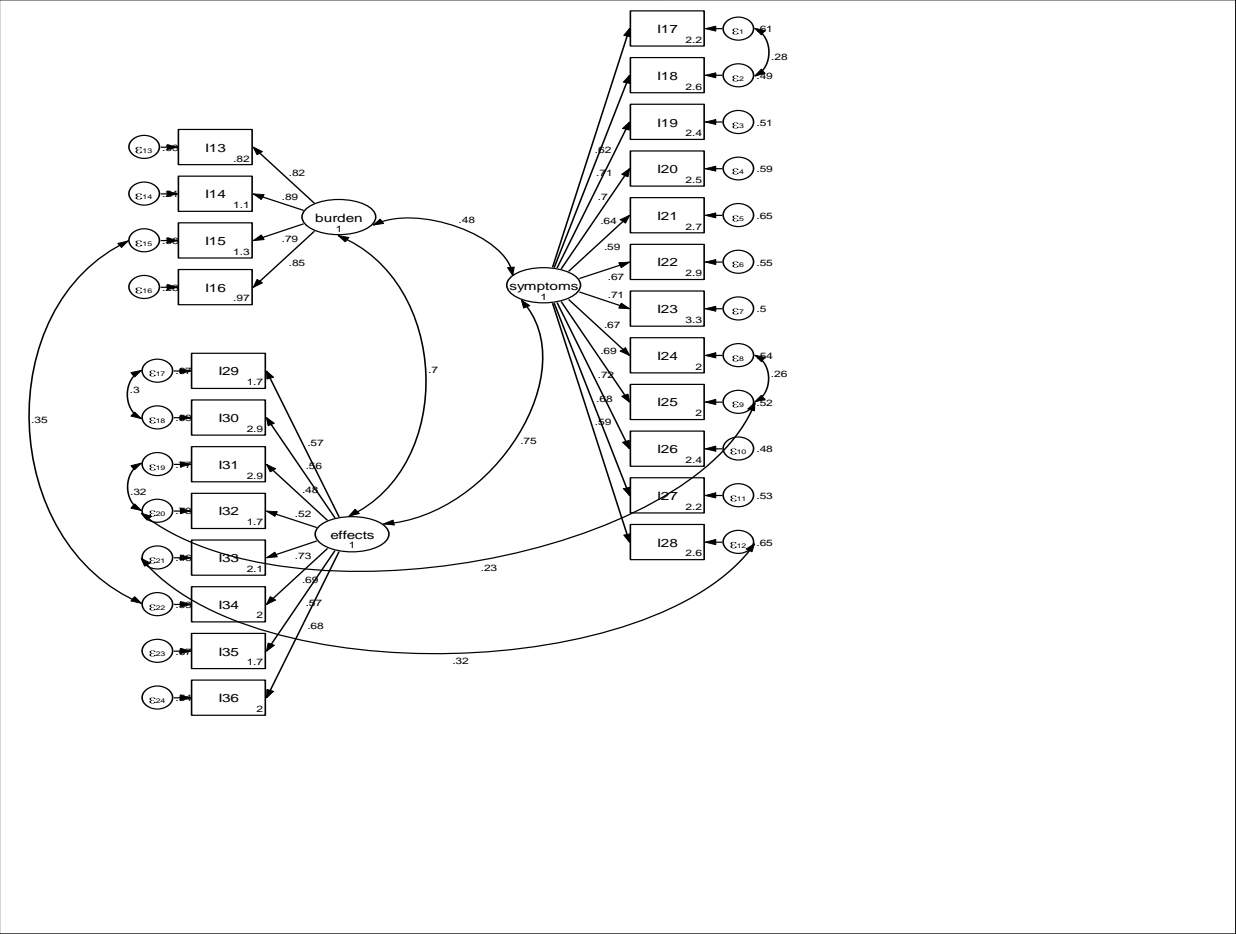

Supplement: MOESM2 [file 20122286]
